# THE AMERICAN JOURNAL OF PSYCHIATRY

---

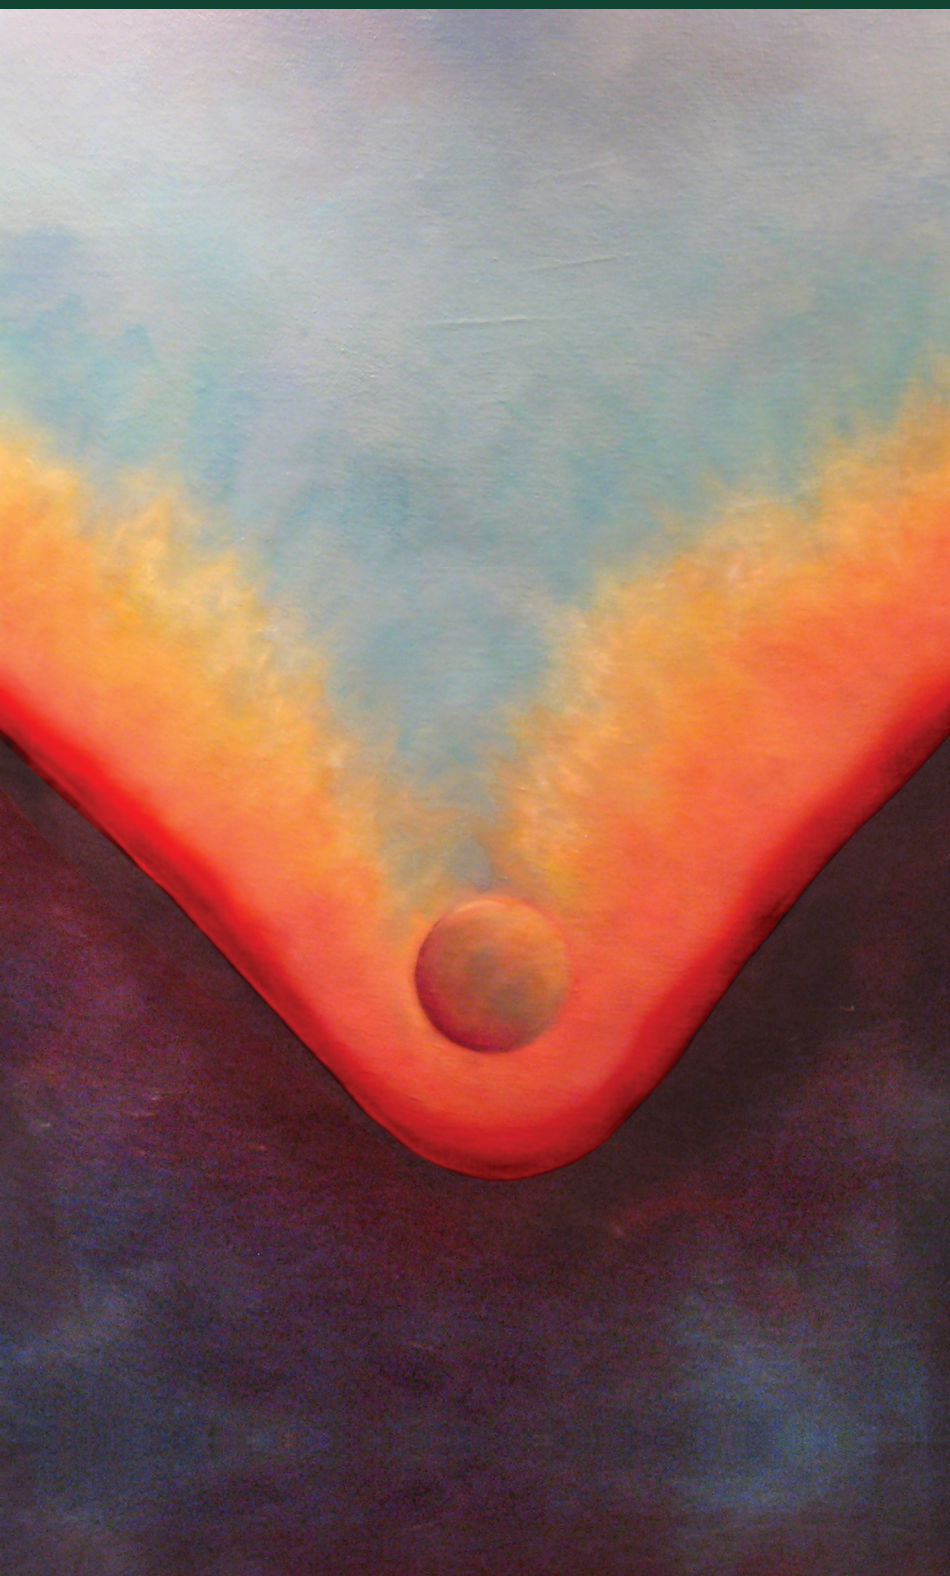

**Cholinergic Agonists as Novel Treatments for Schizophrenia: The Promise of Rational Drug Development for Psychiatry**

Jeffrey A. Lieberman, M.D., et al. 931

**New Insights Into Clinical Response in Schizophrenia: From Dopamine D<sub>2</sub> Receptor Occupancy to Patients' Quality of Life**

Donald C. Goff, M.D. 940

**The Evolution of the Cognitive Model of Depression and Its Neurobiological Correlates**

Aaron T. Beck, M.D. 969

**Selective Muscarinic Receptor Agonist Xanomeline as a Novel Treatment Approach for Schizophrenia**

Anantha Shekhar, M.D, Ph.D., et al. 1033

**Continuing Medical Education** 1079

**August 2008**

**Volume 165 • Number 8**

---

Official Journal of the  
AMERICAN PSYCHIATRIC ASSOCIATION

---

[ajp.psychiatryonline.org](http://ajp.psychiatryonline.org)
