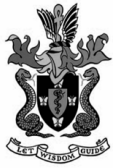

# THE BRITISH JOURNAL OF PSYCHIATRY

July 2008, VOL. 193

|                        |                                                                                                                                                                                                                                                                                                                                                                                                                                                                                                             |                     |                                                                                                                                                                                                                                                |
|------------------------|-------------------------------------------------------------------------------------------------------------------------------------------------------------------------------------------------------------------------------------------------------------------------------------------------------------------------------------------------------------------------------------------------------------------------------------------------------------------------------------------------------------|---------------------|------------------------------------------------------------------------------------------------------------------------------------------------------------------------------------------------------------------------------------------------|
| A1                     | <b>Editorial Board</b>                                                                                                                                                                                                                                                                                                                                                                                                                                                                                      | 44                  | <b>Structured risk assessment and violence in acute psychiatric wards: randomised controlled trial</b><br>C. Abderhalden, I. Needham, T. Dassen, R. Halfens, H.-J. Haug, and J.E. Fischer                                                      |
| A3                     | <b>Highlights of this issue</b>                                                                                                                                                                                                                                                                                                                                                                                                                                                                             |                     |                                                                                                                                                                                                                                                |
| <b>Editorials</b>      |                                                                                                                                                                                                                                                                                                                                                                                                                                                                                                             |                     |                                                                                                                                                                                                                                                |
| 1                      | <b>Psychiatry's 200th birthday</b><br>A. Marneros                                                                                                                                                                                                                                                                                                                                                                                                                                                           | 50                  | <b>Egas Moniz (1875–1955), the father of psychosurgery—psychiatry in pictures</b><br>P. Fusar-Poli, P. Allen, and P. McGuire                                                                                                                   |
| 4                      | <b>Clinical pathways in psychiatry</b><br>S.E. Evans-Lacko, M. Jarrett, P. McCrone, and G. Thornicroft                                                                                                                                                                                                                                                                                                                                                                                                      | 51                  | <b>Cognitive-behavioural therapy v. structured care for medically unexplained symptoms: randomised controlled trial</b><br>A. Sumathipala, S. Siribaddana, M.R.N. Abeysingha, P. De Silva, M. Dewey, M. Prince, and A.H. Mann                  |
| <b>Special article</b> |                                                                                                                                                                                                                                                                                                                                                                                                                                                                                                             |                     |                                                                                                                                                                                                                                                |
| 6                      | <b>Wake-up call for British psychiatry</b><br>N. Craddock, D. Antebi, M.-J. Attenburrow, A. Bailey, A. Carson, P. Cowen, B. Craddock, J. Eagles, K. Ebmeier, A. Farmer, S. Fazel, N. Ferrier, J. Geddes, G. Goodwin, P. Harrison, K. Hawton, S. Hunter, R. Jacoby, I. Jones, P. Keedwell, M. Kerr, P. Mackin, P. McGuffin, D.J. MacIntyre, P. McConville, D. Mountain, M.C. O'Donovan, M.J. Owen, F. Oyeboode, M. Phillips, J. Price, P. Shah, D.J. Smith, J. Walters, P. Woodruff, A. Young, and S. Zammit | 59                  | <b>Is autism getting commoner? – In 100 words</b><br>E. Fombonne                                                                                                                                                                               |
| <b>Review article</b>  |                                                                                                                                                                                                                                                                                                                                                                                                                                                                                                             |                     |                                                                                                                                                                                                                                                |
| 10                     | <b>Efficacy of antidepressants in juvenile depression: meta-analysis</b><br>E.M. Tsapakis, F. Soldani, L. Tondo, and R.J. Baldessarini                                                                                                                                                                                                                                                                                                                                                                      | 60                  | <b>Assessing competence in cognitive-behavioural therapy</b><br>A.J.A. Keen and M.H. Freeston                                                                                                                                                  |
| <b>Papers</b>          |                                                                                                                                                                                                                                                                                                                                                                                                                                                                                                             |                     |                                                                                                                                                                                                                                                |
| 18                     | <b>Psychoses, ethnicity and socio-economic status</b><br>J.B. Kirkbride, D. Barker, F. Cowden, R. Stamps, M. Yang, P.B. Jones, and J.W. Coid                                                                                                                                                                                                                                                                                                                                                                | 65                  | <b>Brain dopamine response in human opioid addiction</b><br>M.R.C. Daglish, T.M. Williams, S.J. Wilson, L.G. Taylor, C.B. Eap, M. Augsburger, C. Giroud, D.J. Brooks, J.S. Myles, P. Grasby, A.R. Lingford-Hughes, and D.J. Nutt               |
| 25                     | <b>White-matter hyperintensities in first-episode psychosis</b><br>M.V. Zanetti, M.S. Schaufelberger, C.C. de Castro, P.R. Menezes, M. Sczufca, P.K. McGuire, R.M. Murray, and G.F. Busatto                                                                                                                                                                                                                                                                                                                 | 72                  | <b>Doppelgänger, Re-Encounter, Friend—poems by doctors</b><br>E. Slater                                                                                                                                                                        |
| 31                     | <b>Principal components analysis of a large cohort with Tourette syndrome</b><br>M.M. Robertson, R.R. Althoff, A. Hafez, and D.L. Pauls                                                                                                                                                                                                                                                                                                                                                                     | 73                  | <b>Patterns of suicide by occupation in England and Wales: 2001–2005</b><br>H. Meltzer, C. Griffiths, A. Brock, C. Rooney, and R. Jenkins                                                                                                      |
| 37                     | <b>Comparison of antipsychotic medication effects on reducing violence in people with schizophrenia</b><br>J.W. Swanson, M.S. Swartz, R.A. Van Dorn, J. Volavka, J. Monahan, T.S. Stroup, J.P. McEvoy, H.R. Wagner, E.B. Elbogen, and J.A. Lieberman, on behalf of the CATIE investigators                                                                                                                                                                                                                  | <b>Short report</b> |                                                                                                                                                                                                                                                |
|                        |                                                                                                                                                                                                                                                                                                                                                                                                                                                                                                             | 77                  | <b>Mental state decoding v. mental state reasoning as a mediator between cognitive and social function in psychosis</b><br>N. McGlade, C. Behan, J. Hayden, T. O'Donoghue, R. Peel, F. Haq, M. Gill, A. Corvin, E. O'Callaghan, and E. Donohoe |
|                        |                                                                                                                                                                                                                                                                                                                                                                                                                                                                                                             | <b>Columns</b>      |                                                                                                                                                                                                                                                |
|                        |                                                                                                                                                                                                                                                                                                                                                                                                                                                                                                             | 79                  | <b>Correspondence</b>                                                                                                                                                                                                                          |
|                        |                                                                                                                                                                                                                                                                                                                                                                                                                                                                                                             | 83                  | <b>Book reviews</b>                                                                                                                                                                                                                            |
|                        |                                                                                                                                                                                                                                                                                                                                                                                                                                                                                                             | 88                  | <b>Contents of <i>Advances in Psychiatric Treatment</i></b>                                                                                                                                                                                    |
|                        |                                                                                                                                                                                                                                                                                                                                                                                                                                                                                                             | 89                  | <b>Contents of the <i>American Journal of Psychiatry</i></b>                                                                                                                                                                                   |
|                        |                                                                                                                                                                                                                                                                                                                                                                                                                                                                                                             | 90                  | <b>From the Editor's desk</b>                                                                                                                                                                                                                  |

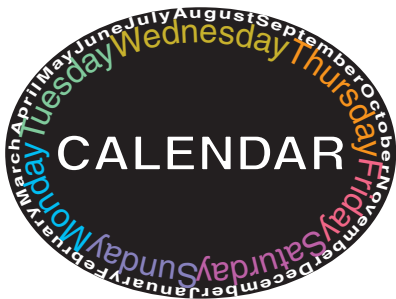

For free listing of your organization's official annual or regional meeting, please send us the following information: sponsor, location, inclusive dates, type and number of continuing education credits (if available), and the name, address, and telephone number of the person or group to contact for more information. In order for an event to appear in our listing, all notices and changes must be received at least 6 months in advance of the meeting and should be addressed to:

*Calendar, American Journal of Psychiatry, 1000 Wilson Boulevard, Suite 1825, Arlington, VA 22209-3901, jblair@psych.org (e-mail).*

*Because of space limitations, only listings of meetings of the greatest interest to Journal readers will be included.*

## SEPTEMBER

**September 4–7**, Canadian Psychiatric Association 58th Annual Meeting, Vancouver, British Columbia, Canada. Contact: 260-441 MacLaren Street, Ottawa, ON K2P 2H3, Canada; (800) 267-1555 (tel), (613) 234-9857 (fax), cpa@medical.org (e-mail).

**September 20–25**, XIV World Congress of Psychiatry, Prague. Contact: Dr. Jiri Raboch, jiri.raboch@lf1cuni.cz (e-mail), www.wpanet.org (web site).

**September 25–26**, Critical Issues in the Care of Older Adults: Managing Depression & Substance Use in Later Life, Ann Arbor, MI. Contact: Registrar, Office of Continuing Medical Education, University of Michigan Medical School, G1200 Towsley Center, 1500 E. Medical Center Drive, SPC 5201, Ann Arbor, MI 48109-5201, (734) 763-1400 (tel), (734) 936-1641 (fax), OCME@umich.edu (e-mail), http://cme.med.umich.edu (web site).

## OCTOBER

**October 2–5**, 60th Institute on Psychiatric Services, American Psychiatric Association, Chicago, IL. Contact: Jill Gruber, APA Annual Meetings Dept., 1000 Wilson Blvd., Ste. 1825, Arlington, VA 22209; (703) 907-7815.

**October 17–19**, 3rd International Conference on Schizophrenia (IConS III), Chennai, India. Contact: Schizophrenia Research Foundation (SCARF), scarf@vsnl.com (e-mail), www.icons-scarf.org (web site).

**October 28–November 2**, 55th Annual Meeting of the American Academy of Child and Adolescent Psychiatry, Chicago. Contact: AACAP, 3615 Wisconsin Avenue, N.W., Washington, DC 20016-3007; (202) 966-7300 (tel), (202) 966-2891 (fax), meetings@

aacap.org (e-mail), www.aacap.org (web site).

## NOVEMBER

**November 14–17**, Annual Conference of the International Society for the Study of Trauma and Dissociation, Chicago. Contact: Heidi Walker, Executive Director; hwalker@amg-inc.com (e-mail), isst-d.org (web site).

## FEBRUARY 2009

**February 18–22**, Annual Meeting of the American Neuropsychiatric Association (ANPA), San Antonio, TX. Contact: ANPA office; (614) 447-2077 (tel), (614) 263-4366 (fax), anpa@osu.edu (e-mail), www.anpaonline.org (web site).

**February 25–March 1**, American College of Psychiatrists Annual Meeting, Tucson, AZ. Contact: 122 South Michigan Avenue, Suite 1360, Chicago, IL 60603; (312) 662-1020 (tel), (312) 662-1025 (fax), angel@ACPsych.org (e-mail).

## MARCH

**March 5–8**, 22nd Annual Meeting of the American Association for Geriatric Psychiatry, Honolulu. Contact: AAGP, 7910 Woodmont Ave., Ste. 1050, Bethesda, MD 20814-3004; (301) 654-7850 (tel), (301) 654-4137 (fax), www.aagpmeeting.org (web site).

**March 27–29**, 3rd International Conference of The International Society of Interpersonal Psychotherapy (ISIPT), New York City, NY. Contact: 2009 ISIPT Planning Committee; hv2009@columbia.edu (e-mail).

## APRIL

**April 22–26**, Annual Meeting and Scientific Sessions of the Society of Be-

havioral Medicine, Montreal, Quebec. Contact: Society of Behavioral Medicine, (414) 918-3156 (tel), (414) 276-3349 (fax), info@sbm.org (e-mail).

## MAY

**May 16–21**, 162nd Annual Meeting of the American Psychiatric Association, San Francisco, CA. Contact: Cathy Nash, APA Annual Meetings Dept., 1000 Wilson Blvd., Ste. 1825, Arlington, VA 22209; (703) 907-7822.

## JUNE

**June 16–20**, 2nd Thematic Conference on Legal and Forensic Psychiatry, Madrid, Spain. Contact: World Psychiatric Association, Alfredo Calcedo Barba, forensicpsychiatry2009@gmail.com.

## AUGUST

**August 27–30**, Canadian Psychiatric Association 59th Annual Meeting, St. Johns, Newfoundland, Canada. Contact: 260-441 MacLaren Street, Ottawa, ON K2P 2H3, Canada; (800) 267-1555 (tel), (613) 234-9857 (fax), conferene@cpa-apc.org (e-mail). www.cpa-apc.org (web site).

## OCTOBER

**October 8–11**, 61st Institute on Psychiatric Services, American Psychiatric Association, New York, NY. Contact: Jill Gruber, APA Annual Meetings Dept., 1000 Wilson Blvd., Ste. 1825, Arlington, VA 22209; (703) 907-7815.

**October 27–November 1**, 56th Annual Meeting of the American Academy of Child and Adolescent Psychiatry, Honolulu, HI. Contact: AACAP, 3615 Wisconsin Avenue, N.W., Washington, DC

*Continued on page A40*

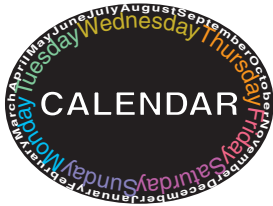

Continued from page A39

## OCTOBER

Oct 14–17, 57th Annual Meeting of the American Academy of Child and Adolescent Psychiatry, Boston, MA. Contact: AACAP, 3615 Wisconsin Avenue, N.W., Washington, DC 20016-3007; (202) 966-7300 (tel), (202) 966-2891 (fax), meetings@aacap.org (e-mail), www.aacap.org (web site).

20016-3007; (202) 966-7300 (tel), (202) 966-2891 (fax), meetings@aacap.org (e-mail), www.aacap.org (web site).

## MAY 2010

May 22–27, 163rd Annual Meeting of the American Psychiatric Association, New Orleans, LA. Contact: Cathy Nash, APA Annual Meetings Dept., 1000 Wilson Blvd., Ste. 1825, Arlington, VA 22209; (703) 907-7822.

### Continuing Medical Education

Three articles in each issue provide an opportunity to earn up to 1 hour category 1 CME credit each by taking a course covering the content. Credit available online only with purchased subscription to AJP's CME program. Visit [cme.psychiatryonline.org](http://cme.psychiatryonline.org) for details.

### FREE AUDIO! Have You Heard?

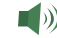

You can listen to highlights of *The American Journal of Psychiatry* by downloading a monthly free .mp3 audio file from our website (<http://ajp.psychiatryonline.org/misc/audio.dtl>) or by subscribing to the AJP Audio podcast at iTunes or other feed reader.

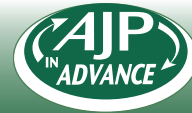

### GET AHEAD!

Subscribers can now view PDFs of all new research articles before print publication by clicking on the "AJP in Advance" logo at the AJP website ([ajp.psychiatryonline.org](http://ajp.psychiatryonline.org)).

## Coming in the September 2008 issue\*

### THE AMERICAN JOURNAL OF PSYCHIATRY

#### *Children of Depressed Mothers 1 Year After the Initiation of Maternal Treatment: Findings From the STAR\*D-Child Study*

D.J. Pilowsky, P. Wickramaratne, A. Talati, M. Tang, C.W. Hughes, J. Garber, E. Malloy, C. King, G. Cerda, A.B. Sood, J.E. Alpert, M.H. Trivedi, M. Fava, A.J. Rush, S. Wisniewski, and M.M. Weissman

#### *An Adoption Study of Parental Depression as an Environmental Liability for Adolescent Depression and Childhood Disruptive Disorders*

E.C. Tully, W.G. Iacono, and M. McGue

#### *Brief Interpersonal Psychotherapy for Depressed Mothers Whose Children Are Receiving Psychiatric Treatment*

H.A. Swartz, E. Frank, A. Zuckoff, J.M. Cyranowski, P.R. Houck, Y. Cheng, M.A.D. Fleming, N.K. Grote, D.A. Brent, and M.K. Shear

#### *Variants in Nicotinic Receptors and Risk for Nicotine Dependence*

L.J. Bierut, J.A. Stitzel, J.C. Wang, A.L. Hinrichs, R.A. Grucza, X. Xuei, N.L. Saccone, S.F. Saccone, S. Bertelsen, L. Fox, W.J. Horton, N. Breslau, J. Budde, C.R. Cloninger, D.M. Dick, T. Foroud, D. Hatsukami, V. Hesselbrock, E.O. Johnson, J. Kramer, S. Kuperman, P.A.F. Madden, K. Mayo, J. Nurnberger, Jr., O. Pomerleau, B. Porjesz, O. Reyes, M. Schuckit, G. Swan, J.A. Tischfield, H.J. Edenberg, J.P. Rice, and A.M. Goate

\*Can't wait? Visit [ajp.psychiatryonline.org](http://ajp.psychiatryonline.org) and click the "AJP in Advance" logo to see all articles uploaded in advance of print!
